# Supplementary material for: Antibiotic and Heavy Metal Co-Resistant Strain Isolated from Enrichment Culture of Marine Sediments, with Potential for Environmental Bioremediation Applications
Source: MDPI journal article supplement (doi:10.3390/antibiotics12091379), 2023-08-29
Supplement: s1 [file s1]

# Supplementary material

## **Antibiotic and heavy metal co-resistant strain isolated from enrichment culture of marine sediments, with potential for environmental bioremediation applications**

**Han-Sheng Zhu<sup>1</sup>, Xiao Liang<sup>1</sup>, Jun-Cheng Liu<sup>2</sup>, Han-Yang Zhong<sup>1</sup>, Yuan-Hang Yang<sup>1</sup>, Wen-Peng Guan<sup>1</sup>, Zong-Jun Du<sup>1,3\*</sup>, Meng-Qi Ye<sup>1,3,4\*</sup>**

<sup>1</sup>Marine College, Shandong University, Weihai, Shandong, 264209, PR China;

<sup>2</sup>SDU-ANU Joint Science College, Shandong University, Weihai, Shandong, 264209, PR China

<sup>3</sup>Weihai Research Institute of Industrial Technology of Shandong University, Weihai, Shandong, 264209, PR China; Shenzhen Research Institute of Shandong University, Shenzhen, Guangdong, 518057, PR China;

<sup>4</sup>Shenzhen Research Institute of Shandong University, Shenzhen, Guangdong, 518057, PR China;

\*Correspondence: yemengqi@126.com (M.-Q.-Y)

duzongjun@sdu.edu.cn (Z.-J.-D.)

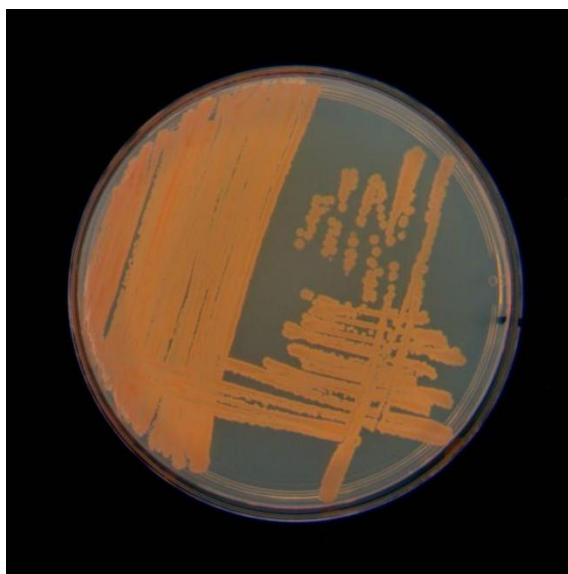

**Figure S1** Colony morphology of strain ZC255

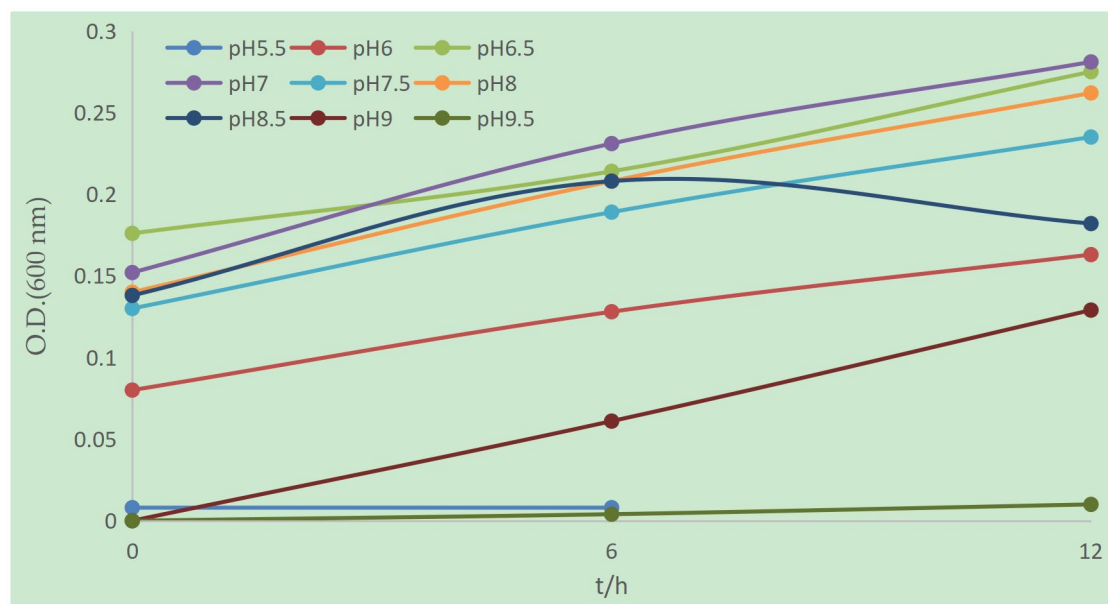

**Figure S2** Growth curve of strain ZC255 at different pH value

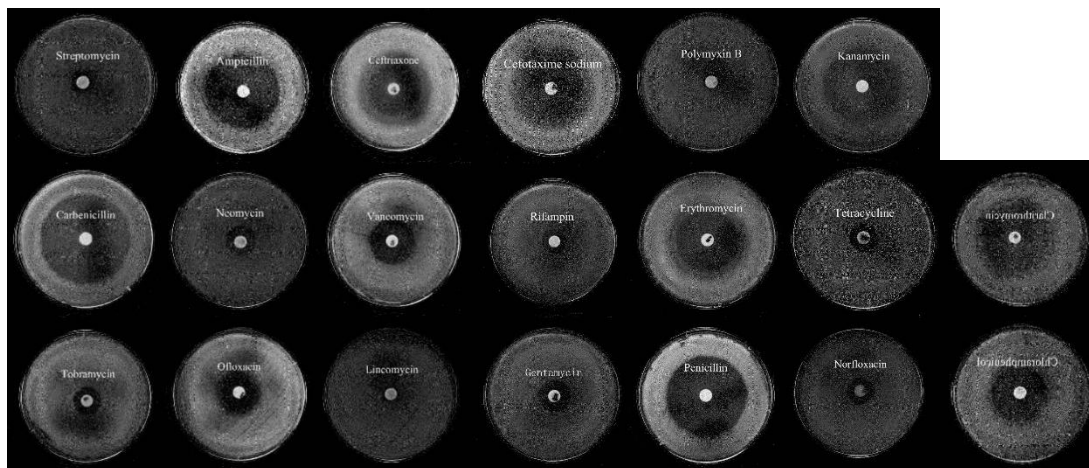

**Figure S3** Antibiotics sensitive tests of strain ZC255

**Table S1** Different characteristics of strain ZC255

| Strain                                          | ZC255 |
|-------------------------------------------------|-------|
| API 20E                                         |       |
| ONPG $\beta$ -Galactosidase                     | -     |
| ADH    Arginine dihydrolase                     | -     |
| LDC    Lysine decarboxylase                     | -     |
| ODC    Ornithine decarboxylation                | -     |
| CIT    Citrate utilization                      | +     |
| H <sub>2</sub> S    H <sub>2</sub> S production | -     |
| URE    urease                                   | +     |
| TDA    Tryptophan deaminase                     | +     |
| IND    Indole production                        | -     |
| VP    Voges-Proskauer reaction                  | -     |
| GEL    Gelatin                                  | +     |
| GLU    glucose                                  | -     |
| MAN    mannitol                                 | -     |
| INO    inositol                                 | -     |
| SOR    sorbitol                                 | -     |
| RHA    rhamnol                                  | -     |
| SAC    sucrose                                  | -     |
| MEL    melibiose                                | -     |
| AMY    amygdalin                                | -     |

|                           |                                  |   |
|---------------------------|----------------------------------|---|
| ARA                       | arabinose                        | - |
| Biolog GEN III MicroPlate |                                  |   |
| 1A                        | negative-control                 | w |
| 2A                        | dextrin                          | w |
| 3A                        | D-maltose                        | + |
| 4A                        | D-trehalose                      | + |
| 5A                        | D-cellobiose                     | + |
| 6A                        | gentiobioswe                     | - |
| 7A                        | sucrose                          | + |
| 8A                        | D-turanose                       | + |
| 9A                        | stachyose                        | + |
| 10A                       | positive control                 | + |
| 11A                       | pH 6                             | w |
| 12A                       | pH 5                             | - |
| 1B                        | D-raffinose                      | w |
| 2B                        | D-lactose                        | w |
| 3B                        | D-melibiose                      | w |
| 4B                        | $\beta$ -methyl-D-glucoside      | w |
| 5B                        | D-salicin                        | - |
| 6B                        | N-acetyl-D-glucosamine           | + |
| 7B                        | N-acetyl- $\beta$ -D-mannosamine | + |
| 8B                        | N-acetyl-D-galactosamine         | + |

|     |                             |   |
|-----|-----------------------------|---|
| 9B  | N-acetyl neuraminic acid    | + |
| 10B | 1% NaCl                     | + |
| 11B | 4% NaCl                     | w |
| 12B | 8% NaCl                     | - |
| 1C  | $\alpha$ -D-glucose         | - |
| 2C  | D-mannose                   | + |
| 3C  | D-fructose                  | + |
| 4C  | D-galactose                 | + |
| 5C  | 3-methyl glucose            | + |
| 6C  | D-fucose                    | + |
| 7C  | L-fucose                    | + |
| 8C  | L-rhamnose                  | + |
| 9C  | inosine                     | + |
| 10C | 1% sodium lactate           | - |
| 11C | fusidic acid                | - |
| 12C | D-serine                    | - |
| 1D  | D-sorbitol                  | + |
| 2D  | D-mannitol                  | w |
| 3D  | D-arabitol                  | w |
| 4D  | myo-inositol                | + |
| 5D  | glycerol                    | - |
| 6D  | D-glucose-6-PO <sub>4</sub> | - |

|     |                              |   |
|-----|------------------------------|---|
| 7D  | D-fructose-6-PO <sub>4</sub> | - |
| 8D  | D-aspartic acid              | w |
| 9D  | D-serine                     | - |
| 10D | troleandomycin               | - |
| 11D | rifamycin SV                 | - |
| 12D | minocycline                  | - |
| 1E  | gelatin                      | - |
| 2E  | glycyl- L-proline            | - |
| 3E  | L-alanine                    | w |
| 4E  | L-arginine                   | w |
| 5E  | L-aspartic acid              | w |
| 6E  | L-glutamic acid              | w |
| 7E  | L-histidine                  | - |
| 8E  | L-pyroglutamic acid          | w |
| 9E  | L-serine                     | w |
| 10E | lincomycin                   | - |
| 11E | guanidine HCl                | - |
| 12E | niaproof 4                   | - |
| 1F  | pectin                       | + |
| 2F  | D-galacturonic acid          | w |
| 3F  | L-galactonic acid lactone    | - |
| 4F  | D-gluconic acid              | + |



|     |                                   |   |
|-----|-----------------------------------|---|
| 5F  | D-glucuronic acid                 | - |
| 6F  | glucuronamide                     | - |
| 7F  | mucic acid                        | w |
| 8F  | quinic acid                       | w |
| 9F  | D-saccharic acid                  | w |
| 10F | vancomycin                        | - |
| 11F | tetrazolium violet                | - |
| 12F | tetrazolium blue                  | - |
| 1G  | $\rho$ -hydroxy-phenylacetic acid | - |
| 2G  | methyl pyruvate                   | - |
| 3G  | D-lactic acid methyl ester        | w |
| 4G  | L-lactic acid                     | w |
| 5G  | citric acid                       | - |
| 6G  | $\alpha$ -keto-glutaric acid      | w |
| 7G  | D-malic acid                      | w |
| 8G  | L-malic acid                      | w |
| 9G  | bromo-succinic acid               | - |
| 10G | nalidixic acid                    | - |
| 11G | lithium chloride                  | - |
| 12G | potassium tellurite               | - |
| 1H  | tween-40                          | - |
| 2H  | $\gamma$ -amino-butyric acid      | - |

|     |                                    |   |
|-----|------------------------------------|---|
| 3H  | $\alpha$ -hydroxy-butyric acid     | - |
| 4H  | $\beta$ -hydroxy-D, L-butyric acid | w |
| 5H  | $\alpha$ -keto-butyric acid        | - |
| 6H  | acetoacetic acid                   | + |
| 7H  | propionic acid                     | - |
| 8H  | acetic acid                        | + |
| 9H  | formic acid                        | - |
| 10H | aztreonam                          | - |
| 11H | sodium butyrate                    | - |
| 12H | Sodium bromate                     | - |

#### API 50 CH

|    |      |   |
|----|------|---|
| 1  | GLY  | + |
| 2  | ERY  | - |
| 3  | DARA | - |
| 4  | LARA | - |
| 5  | RIB  | + |
| 6  | DXYL | - |
| 7  | LXYL | - |
| 8  | ADO  | - |
| 9  | MDX  | - |
| 10 | GAL  | + |
| 11 | GLU  | + |

|    |     |   |
|----|-----|---|
| 12 | FRU | + |
| 13 | MNE | + |
| 14 | SBE | - |
| 15 | RHA | - |
| 16 | DUL | - |
| 17 | INO | - |
| 18 | MAN | - |
| 19 | SOB | - |
| 20 | MDM | - |
| 21 | MDG | + |
| 22 | NAG | + |
| 23 | AMY | + |
| 24 | ARB | + |
| 25 | ESC | + |
| 26 | SAL | + |
| 27 | CEL | + |
| 28 | MAL | + |
| 29 | LAC | + |
| 30 | MEL | + |
| 31 | SAC | + |
| 32 | TRE | + |
| 33 | INU | - |

|    |      |   |
|----|------|---|
| 34 | MLZ  | + |
| 35 | RAF  | + |
| 36 | AMD  | + |
| 37 | GLYG | + |
| 38 | XLT  | - |
| 39 | GEN  | + |
| 40 | TUR  | + |
| 41 | LYX  | - |
| 42 | TAG  | + |
| 43 | DFUC | - |
| 44 | LFUC | - |
| 45 | DARL | - |
| 46 | LARL | - |
| 47 | GNT  | - |
| 48 | 2KG  | - |
| 49 | 5KG  | + |

#### API ZYM

|   |                            |   |
|---|----------------------------|---|
| 1 | 2-Naphthyl phosphate       | - |
| 2 | 2-Naphthyl butyrate        | - |
| 3 | 2-Naphthyl octanoate       | + |
| 4 | 2-Naphthyl tetradecanoate  | + |
| 5 | L-Leucinyl-2-naphthylamine | - |

|    |                                                  |   |
|----|--------------------------------------------------|---|
| 6  | L-Valinyl-2-naphthylamine                        | - |
| 7  | L-Cystinyl-2-naphthylamine                       | - |
| 8  | N-Benzoyl-DL-argininyl-2-naphthylamine           | - |
| 9  | N-Shodanoyl-phenylalanine2-naphthylamine         | - |
| 10 | N-Naphthyl-phosphate                             | + |
| 11 | Naphthol-AS-BI-phosphate                         | - |
| 12 | 6-Bromo-2-naphthyl- $\alpha$ D-galactopyranoside | - |
| 13 | 2-Naphthyl- $\beta$ D-galactopyranoside          | - |
| 14 | Naphthol-AS- $\beta$ -mono-D-glucuronide         | - |
| 15 | 2-Naphthyl- $\alpha$ D-glucopyranoside           | - |
| 16 | 6-Bromo-2-naphthyl- $\beta$ D-glucopyranoside    | - |
| 17 | 1-Naphthyl-N-acetyl- $\beta$ D-glucosamine       | - |
| 18 | 6-Bromo-2-naphthyl- $\alpha$ D-mannopyranoside   | - |
| 19 | 2-Naphthyl- $\alpha$ L-fructopyranoside          | - |

---

Table S2 Reference standard of Susceptibility testing

| Antibiotics          | Drug content<br>(ug/disk) | Bacteriostatic circle diameter (mm) |           |            |
|----------------------|---------------------------|-------------------------------------|-----------|------------|
|                      |                           | Resistance                          | Intermedi | Susceptibl |
| Lincomycin           | 2                         | 12                                  | 13-15     | 15         |
| Carbenicillin        | 100                       | 19                                  | 20-22     | 23         |
| Vancomycin           | 30                        | 14                                  | 15-16     | 17         |
| Norfloxacin          | 30                        | 12                                  | 13-16     | 17         |
| Kanamycin            | 30                        | 13                                  | 14-17     | 18         |
| Ofloxacin            | 5                         | 12                                  | 13-17     | 18         |
| Ampicillin           | 10                        | 13                                  | 14-16     | 17         |
| Penicillin           | 10                        | 14                                  |           | 15         |
| Polymyxin B          | 300                       | 8                                   | 10        | 12         |
| Ceftriaxone          | 30                        | 13                                  | 14-20     | 21         |
| Erythromycin         | 15                        | 13                                  | 14-22     | <u>≥23</u> |
| Chloramphenicol      | 30                        | 12                                  | 13-17     | 18         |
| Streptomycin         | 10                        | 11                                  | 12-14     | 15         |
| Clarithromycin       | 10                        | 13                                  | 14-17     | 18         |
| Rifampin             | 5                         | 16                                  | 17-19     | 20         |
| Cefotaxime<br>sodium | 30                        | 14                                  | 15-25     | 26         |
| Neomycin             | 30                        | 13                                  | 14-18     | 19         |
| Tobramycin           | 10                        | 12                                  | 13-14     | 15         |

|              |    |    |       |    |
|--------------|----|----|-------|----|
| Tetracycline | 30 | 14 | 15-18 | 19 |
| Gentamycin   | 10 | 12 | 13-14 | 15 |

---
